# Supplementary material
Source: publisher site journal article supplement (https://www.spandidos-publications.com/2869/downloadSupplementary)
Supplement: Supplementary file 1 [file downloadSupplementary]

## Sheet: Sheet1
Table SII. The 386 predicted trans-targets of 12 differentially expressed lncRNAs.
Accession	Trans_Target_GeneSymbol	Trans_Target_Description
NR_015451	AARD	alanine and arginine rich domain containing protein [Source:HGNC Symbol-3BAcc:HGNC:33842]
lnc-MUC20-9:1	ABL2	ABL proto-oncogene 2-2C non-receptor tyrosine kinase [Source:HGNC Symbol-3BAcc:HGNC:77]
NR_015451	ABL2	ABL proto-oncogene 2-2C non-receptor tyrosine kinase [Source:HGNC Symbol-3BAcc:HGNC:77]
lnc-MUC20-9:1	ACER3	alkaline ceramidase 3 [Source:HGNC Symbol-3BAcc:HGNC:16066]
NONHSAT089168	ACER3	alkaline ceramidase 3 [Source:HGNC Symbol-3BAcc:HGNC:16066]
NR_015451	ACER3	alkaline ceramidase 3 [Source:HGNC Symbol-3BAcc:HGNC:16066]
NONHSAT089168	ACSL6	acyl-CoA synthetase long-chain family member 6 [Source:HGNC Symbol-3BAcc:HGNC:16496]
NR_015451	ACSL6	acyl-CoA synthetase long-chain family member 6 [Source:HGNC Symbol-3BAcc:HGNC:16496]
lnc-MUC20-9:1	ADAT1	adenosine deaminase-2C tRNA specific 1 [Source:HGNC Symbol-3BAcc:HGNC:228]
lnc-MUC20-9:1	AGMO	alkylglycerol monooxygenase [Source:HGNC Symbol-3BAcc:HGNC:33784]
NONHSAT089168	AK1	adenylate kinase 1 [Source:HGNC Symbol-3BAcc:HGNC:361]
NR_015451	AK3	adenylate kinase 3 [Source:HGNC Symbol-3BAcc:HGNC:17376]
NR_015451	AKAP5	A-kinase anchoring protein 5 [Source:HGNC Symbol-3BAcc:HGNC:375]
NONHSAT089168	AKR1D1	aldo-keto reductase family 1 member D1 [Source:HGNC Symbol-3BAcc:HGNC:388]
lnc-HSP90B1-3:1	ALDH1B1	aldehyde dehydrogenase 1 family member B1 [Source:HGNC Symbol-3BAcc:HGNC:407]
NONHSAT089168	ANKRD12	ankyrin repeat domain 12 [Source:HGNC Symbol-3BAcc:HGNC:29135]
NR_015451	ANKRD12	ankyrin repeat domain 12 [Source:HGNC Symbol-3BAcc:HGNC:29135]
NR_015451	ANKRD16	ankyrin repeat domain 16 [Source:HGNC Symbol-3BAcc:HGNC:23471]
NR_015451	ANKRD62	ankyrin repeat domain 62 [Source:HGNC Symbol-3BAcc:HGNC:35241]
lnc-MUC20-9:1	AP1S3	adaptor related protein complex 1 sigma 3 subunit [Source:HGNC Symbol-3BAcc:HGNC:18971]
NONHSAT089168	AP3S2	adaptor related protein complex 3 sigma 2 subunit [Source:HGNC Symbol-3BAcc:HGNC:571]
NR_038275	AP3S2	adaptor related protein complex 3 sigma 2 subunit [Source:HGNC Symbol-3BAcc:HGNC:571]
lnc-HSP90B1-3:1	AP4S1	adaptor related protein complex 4 sigma 1 subunit [Source:HGNC Symbol-3BAcc:HGNC:575]
lnc-MUC20-9:1	AP5B1	adaptor related protein complex 5 beta 1 subunit [Source:HGNC Symbol-3BAcc:HGNC:25104]
NR_015451	APOBEC3A	apolipoprotein B mRNA editing enzyme catalytic subunit 3A [Source:HGNC Symbol-3BAcc:HGNC:17343]
NONHSAT089168	APOL1	apolipoprotein L1 [Source:HGNC Symbol-3BAcc:HGNC:618]
NR_015451	APOL1	apolipoprotein L1 [Source:HGNC Symbol-3BAcc:HGNC:618]
NONHSAT089168	ARFIP2	ADP ribosylation factor interacting protein 2 [Source:HGNC Symbol-3BAcc:HGNC:17160]
lnc-HSP90B1-3:1	ARGFX	arginine-fifty homeobox [Source:HGNC Symbol-3BAcc:HGNC:30146]
NR_015451	ARHGAP26	Rho GTPase activating protein 26 [Source:HGNC Symbol-3BAcc:HGNC:17073]
lnc-HSP90B1-3:1	ARHGAP45	Rho GTPase activating protein 45 [Source:HGNC Symbol-3BAcc:HGNC:17102]
NONHSAT089168	ARIH2OS	ariadne homolog 2 opposite strand [Source:HGNC Symbol-3BAcc:HGNC:34425]
NR_015451	ARIH2OS	ariadne homolog 2 opposite strand [Source:HGNC Symbol-3BAcc:HGNC:34425]
NR_015451	ARNTL2	aryl hydrocarbon receptor nuclear translocator like 2 [Source:HGNC Symbol-3BAcc:HGNC:18984]
lnc-MUC20-9:1	ATF6	activating transcription factor 6 [Source:HGNC Symbol-3BAcc:HGNC:791]
NONHSAT089168	ATF6	activating transcription factor 6 [Source:HGNC Symbol-3BAcc:HGNC:791]
NR_015451	ATF6	activating transcription factor 6 [Source:HGNC Symbol-3BAcc:HGNC:791]
NR_034072	ATG14	autophagy related 14 [Source:HGNC Symbol-3BAcc:HGNC:19962]
lnc-HSP90B1-3:1	ATP6V0A2	ATPase H+ transporting V0 subunit a2 [Source:HGNC Symbol-3BAcc:HGNC:18481]
NR_034072	AXL	AXL receptor tyrosine kinase [Source:HGNC Symbol-3BAcc:HGNC:905]
NONHSAT089168	BCDIN3D	BCDIN3 domain containing RNA methyltransferase [Source:HGNC Symbol-3BAcc:HGNC:27050]
NR_015451	BCDIN3D	BCDIN3 domain containing RNA methyltransferase [Source:HGNC Symbol-3BAcc:HGNC:27050]
NONHSAT089168	BIVM	basic-2C immunoglobulin-like variable motif containing [Source:HGNC Symbol-3BAcc:HGNC:16034]
lnc-MUC20-9:1	BORCS7	BLOC-1 related complex subunit 7 [Source:HGNC Symbol-3BAcc:HGNC:23516]
NONHSAT089168	BRIP1	BRCA1 interacting protein C-terminal helicase 1 [Source:HGNC Symbol-3BAcc:HGNC:20473]
NR_015451	BRIP1	BRCA1 interacting protein C-terminal helicase 1 [Source:HGNC Symbol-3BAcc:HGNC:20473]
NONHSAT089168	BTN3A2	butyrophilin subfamily 3 member A2 [Source:HGNC Symbol-3BAcc:HGNC:1139]
lnc-HSP90B1-3:1	C11orf58	chromosome 11 open reading frame 58 [Source:HGNC Symbol-3BAcc:HGNC:16990]
NONHSAT089168	C15orf38-AP3S2	C15orf38-AP3S2 readthrough [Source:HGNC Symbol-3BAcc:HGNC:38824]
NR_038275	C15orf38-AP3S2	C15orf38-AP3S2 readthrough [Source:HGNC Symbol-3BAcc:HGNC:38824]
NONHSAT089168	C17orf75	chromosome 17 open reading frame 75 [Source:HGNC Symbol-3BAcc:HGNC:30173]
NR_015451	C17orf75	chromosome 17 open reading frame 75 [Source:HGNC Symbol-3BAcc:HGNC:30173]
lnc-MUC20-9:1	C4orf19	chromosome 4 open reading frame 19 [Source:HGNC Symbol-3BAcc:HGNC:25618]
NONHSAT089168	CABP4	calcium binding protein 4 [Source:HGNC Symbol-3BAcc:HGNC:1386]
lnc-MUC20-9:1	CAMK1D	calcium/calmodulin dependent protein kinase ID [Source:HGNC Symbol-3BAcc:HGNC:19341]
NR_015451	CAMK2G	calcium/calmodulin dependent protein kinase II gamma [Source:HGNC Symbol-3BAcc:HGNC:1463]
NR_015451	CBX5	chromobox 5 [Source:HGNC Symbol-3BAcc:HGNC:1555]
lnc-HSP90B1-3:1	CCL22	C-C motif chemokine ligand 22 [Source:HGNC Symbol-3BAcc:HGNC:10621]
lnc-MUC20-9:1	CCL5	C-C motif chemokine ligand 5 [Source:HGNC Symbol-3BAcc:HGNC:10632]
NONHSAT089168	CCL5	C-C motif chemokine ligand 5 [Source:HGNC Symbol-3BAcc:HGNC:10632]
NR_015451	CCL5	C-C motif chemokine ligand 5 [Source:HGNC Symbol-3BAcc:HGNC:10632]
NR_034072	CCL5	C-C motif chemokine ligand 5 [Source:HGNC Symbol-3BAcc:HGNC:10632]
lnc-MUC20-9:1	CCR6	C-C motif chemokine receptor 6 [Source:HGNC Symbol-3BAcc:HGNC:1607]
lnc-MUC20-9:1	CD109	CD109 molecule [Source:HGNC Symbol-3BAcc:HGNC:21685]
NR_015451	CD82	CD82 molecule [Source:HGNC Symbol-3BAcc:HGNC:6210]
lnc-MUC20-9:1	CD84	CD84 molecule [Source:HGNC Symbol-3BAcc:HGNC:1704]
lnc-MUC20-9:1	CD99	CD99 molecule [Source:HGNC Symbol-3BAcc:HGNC:7082]
NR_015451	CD99	CD99 molecule [Source:HGNC Symbol-3BAcc:HGNC:7082]
NR_015451	CEP68	centrosomal protein 68 [Source:HGNC Symbol-3BAcc:HGNC:29076]
NR_038275	CHP1	calcineurin like EF-hand protein 1 [Source:HGNC Symbol-3BAcc:HGNC:17433]
NR_034072	CHST6	carbohydrate sulfotransferase 6 [Source:HGNC Symbol-3BAcc:HGNC:6938]
NONHSAT089168	CIAO1	cytosolic iron-sulfur assembly component 1 [Source:HGNC Symbol-3BAcc:HGNC:14280]
lnc-HSP90B1-3:1	CLCC1	chloride channel CLIC like 1 [Source:HGNC Symbol-3BAcc:HGNC:29675]
NR_034072	CLN8	ceroid-lipofuscinosis-2C neuronal 8 [Source:HGNC Symbol-3BAcc:HGNC:2079]
lnc-MUC20-9:1	CLUAP1	clusterin associated protein 1 [Source:HGNC Symbol-3BAcc:HGNC:19009]
NONHSAT089168	CLUAP1	clusterin associated protein 1 [Source:HGNC Symbol-3BAcc:HGNC:19009]
NR_015451	COA7	cytochrome c oxidase assembly factor 7 (putative) [Source:HGNC Symbol-3BAcc:HGNC:25716]
lnc-MUC20-9:1	COPA	coatomer protein complex subunit alpha [Source:HGNC Symbol-3BAcc:HGNC:2230]
NONHSAT089168	CPT1A	carnitine palmitoyltransferase 1A [Source:HGNC Symbol-3BAcc:HGNC:2328]
NR_015451	CPT1A	carnitine palmitoyltransferase 1A [Source:HGNC Symbol-3BAcc:HGNC:2328]
NR_015451	CRX	cone-rod homeobox [Source:HGNC Symbol-3BAcc:HGNC:2383]
NR_015451	CYB5R3	cytochrome b5 reductase 3 [Source:HGNC Symbol-3BAcc:HGNC:2873]
lnc-HSP90B1-3:1	CYP51A1	cytochrome P450 family 51 subfamily A member 1 [Source:HGNC Symbol-3BAcc:HGNC:2649]
lnc-HSP90B1-3:1	CYP8B1	cytochrome P450 family 8 subfamily B member 1 [Source:HGNC Symbol-3BAcc:HGNC:2653]
lnc-MUC20-9:1	DBT	dihydrolipoamide branched chain transacylase E2 [Source:HGNC Symbol-3BAcc:HGNC:2698]
lnc-MUC20-9:1	DCAF10	DDB1 and CUL4 associated factor 10 [Source:HGNC Symbol-3BAcc:HGNC:23686]
lnc-MUC20-9:1	DCAF16	DDB1 and CUL4 associated factor 16 [Source:HGNC Symbol-3BAcc:HGNC:25987]
NONHSAT089168	DCAF7	DDB1 and CUL4 associated factor 7 [Source:HGNC Symbol-3BAcc:HGNC:30915]
lnc-MUC20-9:1	DCP1A	decapping mRNA 1A [Source:HGNC Symbol-3BAcc:HGNC:18714]
NR_015451	DCTN5	dynactin subunit 5 [Source:HGNC Symbol-3BAcc:HGNC:24594]
lnc-MUC20-9:1	DESI1	desumoylating isopeptidase 1 [Source:HGNC Symbol-3BAcc:HGNC:24577]
NR_034072	DESI1	desumoylating isopeptidase 1 [Source:HGNC Symbol-3BAcc:HGNC:24577]
lnc-MUC20-9:1	DFFA	DNA fragmentation factor subunit alpha [Source:HGNC Symbol-3BAcc:HGNC:2772]
NONHSAT089168	DFFA	DNA fragmentation factor subunit alpha [Source:HGNC Symbol-3BAcc:HGNC:2772]
NR_015451	DFFA	DNA fragmentation factor subunit alpha [Source:HGNC Symbol-3BAcc:HGNC:2772]
lnc-MUC20-9:1	DGKH	diacylglycerol kinase eta [Source:HGNC Symbol-3BAcc:HGNC:2854]
NONHSAT089168	DIS3L	DIS3 like exosome 3'-5' exoribonuclease [Source:HGNC Symbol-3BAcc:HGNC:28698]
NR_015451	DIS3L	DIS3 like exosome 3'-5' exoribonuclease [Source:HGNC Symbol-3BAcc:HGNC:28698]
lnc-MUC20-9:1	DNAJC21	DnaJ heat shock protein family (Hsp40) member C21 [Source:HGNC Symbol-3BAcc:HGNC:27030]
NONHSAT089168	DNAJC21	DnaJ heat shock protein family (Hsp40) member C21 [Source:HGNC Symbol-3BAcc:HGNC:27030]
NR_015451	DNAJC21	DnaJ heat shock protein family (Hsp40) member C21 [Source:HGNC Symbol-3BAcc:HGNC:27030]
NR_015451	DPYSL5	dihydropyrimidinase like 5 [Source:HGNC Symbol-3BAcc:HGNC:20637]
NONHSAT089168	DSEL	dermatan sulfate epimerase-like [Source:HGNC Symbol-3BAcc:HGNC:18144]
NR_015451	DSEL	dermatan sulfate epimerase-like [Source:HGNC Symbol-3BAcc:HGNC:18144]
lnc-MUC20-9:1	DSG2	desmoglein 2 [Source:HGNC Symbol-3BAcc:HGNC:3049]
NONHSAT089168	DSG3	desmoglein 3 [Source:HGNC Symbol-3BAcc:HGNC:3050]
NR_015451	DSG3	desmoglein 3 [Source:HGNC Symbol-3BAcc:HGNC:3050]
NR_015451	DTD2	D-tyrosyl-tRNA deacylase 2 (putative) [Source:HGNC Symbol-3BAcc:HGNC:20277]
NR_034072	DTD2	D-tyrosyl-tRNA deacylase 2 (putative) [Source:HGNC Symbol-3BAcc:HGNC:20277]
NR_015451	DTX3L	deltex 3 like-2C E3 ubiquitin ligase [Source:HGNC Symbol-3BAcc:HGNC:30323]
lnc-MUC20-9:1	ECE1	endothelin converting enzyme 1 [Source:HGNC Symbol-3BAcc:HGNC:3146]
lnc-HSP90B1-3:1	EEF2K	eukaryotic elongation factor 2 kinase [Source:HGNC Symbol-3BAcc:HGNC:24615]
lnc-HSP90B1-3:1	ELMSAN1	ELM2 and Myb/SANT domain containing 1 [Source:HGNC Symbol-3BAcc:HGNC:19853]
NR_015451	ENTPD4	ectonucleoside triphosphate diphosphohydrolase 4 [Source:HGNC Symbol-3BAcc:HGNC:14573]
NONHSAT089168	ERAP2	endoplasmic reticulum aminopeptidase 2 [Source:HGNC Symbol-3BAcc:HGNC:29499]
NR_015451	F2R	coagulation factor II thrombin receptor [Source:HGNC Symbol-3BAcc:HGNC:3537]
NONHSAT089168	FAM161A	family with sequence similarity 161 member A [Source:HGNC Symbol-3BAcc:HGNC:25808]
NR_015451	FAM161A	family with sequence similarity 161 member A [Source:HGNC Symbol-3BAcc:HGNC:25808]
NR_034072	FAM71F2	family with sequence similarity 71 member F2 [Source:HGNC Symbol-3BAcc:HGNC:27998]
lnc-PNMA2-5:1	FAM9B	family with sequence similarity 9 member B [Source:HGNC Symbol-3BAcc:HGNC:18404]
lnc-MUC20-9:1	FBLIM1	filamin binding LIM protein 1 [Source:HGNC Symbol-3BAcc:HGNC:24686]
NR_015451	FBLIM1	filamin binding LIM protein 1 [Source:HGNC Symbol-3BAcc:HGNC:24686]
lnc-HSP90B1-3:1	FBXL18	F-box and leucine rich repeat protein 18 [Source:HGNC Symbol-3BAcc:HGNC:21874]
NONHSAT089168	FBXL18	F-box and leucine rich repeat protein 18 [Source:HGNC Symbol-3BAcc:HGNC:21874]
NR_015451	FBXL18	F-box and leucine rich repeat protein 18 [Source:HGNC Symbol-3BAcc:HGNC:21874]
NR_015451	FBXL20	F-box and leucine rich repeat protein 20 [Source:HGNC Symbol-3BAcc:HGNC:24679]
NR_015451	FBXO6	F-box protein 6 [Source:HGNC Symbol-3BAcc:HGNC:13585]
lnc-MUC20-9:1	FMN1	formin 1 [Source:HGNC Symbol-3BAcc:HGNC:3768]
lnc-HSP90B1-3:1	FOXK1	forkhead box K1 [Source:HGNC Symbol-3BAcc:HGNC:23480]
NR_015451	FOXK1	forkhead box K1 [Source:HGNC Symbol-3BAcc:HGNC:23480]
lnc-MUC20-9:1	FUT2	fucosyltransferase 2 [Source:HGNC Symbol-3BAcc:HGNC:4013]
lnc-SCD-1:8	FUT3	fucosyltransferase 3 (Lewis blood group) [Source:HGNC Symbol-3BAcc:HGNC:4014]
NONHSAT089168	FZD3	frizzled class receptor 3 [Source:HGNC Symbol-3BAcc:HGNC:4041]
lnc-MUC20-9:1	GALNT15	polypeptide N-acetylgalactosaminyltransferase 15 [Source:HGNC Symbol-3BAcc:HGNC:21531]
NR_015451	GALNT4	polypeptide N-acetylgalactosaminyltransferase 4 [Source:HGNC Symbol-3BAcc:HGNC:4126]
lnc-MUC20-9:1	GAMT	guanidinoacetate N-methyltransferase [Source:HGNC Symbol-3BAcc:HGNC:4136]
lnc-MUC20-9:1	GAS2L3	growth arrest specific 2 like 3 [Source:HGNC Symbol-3BAcc:HGNC:27475]
NR_038275	GATSL2	GATS protein-like 2 [Source:HGNC Symbol-3BAcc:HGNC:37073]
NONHSAT089168	GBP4	guanylate binding protein 4 [Source:HGNC Symbol-3BAcc:HGNC:20480]
NR_015451	GBP4	guanylate binding protein 4 [Source:HGNC Symbol-3BAcc:HGNC:20480]
NONHSAT089168	GCLM	glutamate-cysteine ligase modifier subunit [Source:HGNC Symbol-3BAcc:HGNC:4312]
NONHSAT089168	GDPD1	glycerophosphodiester phosphodiesterase domain containing 1 [Source:HGNC Symbol-3BAcc:HGNC:20883]
lnc-HSP90B1-3:1	GIPR	gastric inhibitory polypeptide receptor [Source:HGNC Symbol-3BAcc:HGNC:4271]
lnc-MUC20-9:1	GK5	glycerol kinase 5 (putative) [Source:HGNC Symbol-3BAcc:HGNC:28635]
NONHSAT089168	GK5	glycerol kinase 5 (putative) [Source:HGNC Symbol-3BAcc:HGNC:28635]
NR_034072	GLTP	glycolipid transfer protein [Source:HGNC Symbol-3BAcc:HGNC:24867]
lnc-MUC20-9:1	GOLGA2	golgin A2 [Source:HGNC Symbol-3BAcc:HGNC:4425]
NR_027411	GOLGA6C	golgin A6 family member C [Source:HGNC Symbol-3BAcc:HGNC:32206]
NR_033350	GOLGA6C	golgin A6 family member C [Source:HGNC Symbol-3BAcc:HGNC:32206]
NR_033353	GOLGA6C	golgin A6 family member C [Source:HGNC Symbol-3BAcc:HGNC:32206]
NR_027411	GOLGA6L10	golgin A6 family-like 10 [Source:HGNC Symbol-3BAcc:HGNC:37228]
NR_033350	GOLGA6L10	golgin A6 family-like 10 [Source:HGNC Symbol-3BAcc:HGNC:37228]
NR_033353	GOLGA6L10	golgin A6 family-like 10 [Source:HGNC Symbol-3BAcc:HGNC:37228]
NR_027411	GOLGA6L4	golgin A6 family-like 4 [Source:HGNC Symbol-3BAcc:HGNC:27256]
NR_033350	GOLGA6L4	golgin A6 family-like 4 [Source:HGNC Symbol-3BAcc:HGNC:27256]
NR_033353	GOLGA6L4	golgin A6 family-like 4 [Source:HGNC Symbol-3BAcc:HGNC:27256]
NR_027411	GOLGA8H	golgin A8 family member H [Source:HGNC Symbol-3BAcc:HGNC:37443]
NR_033350	GOLGA8H	golgin A8 family member H [Source:HGNC Symbol-3BAcc:HGNC:37443]
NR_033353	GOLGA8H	golgin A8 family member H [Source:HGNC Symbol-3BAcc:HGNC:37443]
NR_027411	GOLGA8J	golgin A8 family member J [Source:HGNC Symbol-3BAcc:HGNC:38650]
NR_033350	GOLGA8J	golgin A8 family member J [Source:HGNC Symbol-3BAcc:HGNC:38650]
NR_033353	GOLGA8J	golgin A8 family member J [Source:HGNC Symbol-3BAcc:HGNC:38650]
NR_027411	GOLGA8K	golgin A8 family member K [Source:HGNC Symbol-3BAcc:HGNC:38652]
NR_033350	GOLGA8K	golgin A8 family member K [Source:HGNC Symbol-3BAcc:HGNC:38652]
NR_033353	GOLGA8K	golgin A8 family member K [Source:HGNC Symbol-3BAcc:HGNC:38652]
NR_027411	GOLGA8M	golgin A8 family member M [Source:HGNC Symbol-3BAcc:HGNC:44404]
NR_033350	GOLGA8M	golgin A8 family member M [Source:HGNC Symbol-3BAcc:HGNC:44404]
NR_033353	GOLGA8M	golgin A8 family member M [Source:HGNC Symbol-3BAcc:HGNC:44404]
NR_027411	GOLGA8N	golgin A8 family member N [Source:HGNC Symbol-3BAcc:HGNC:44405]
NR_033350	GOLGA8N	golgin A8 family member N [Source:HGNC Symbol-3BAcc:HGNC:44405]
NR_033353	GOLGA8N	golgin A8 family member N [Source:HGNC Symbol-3BAcc:HGNC:44405]
NR_027411	GOLGA8O	golgin A8 family member O [Source:HGNC Symbol-3BAcc:HGNC:44406]
NR_033350	GOLGA8O	golgin A8 family member O [Source:HGNC Symbol-3BAcc:HGNC:44406]
NR_033353	GOLGA8O	golgin A8 family member O [Source:HGNC Symbol-3BAcc:HGNC:44406]
NR_027411	GOLGA8R	golgin A8 family member R [Source:HGNC Symbol-3BAcc:HGNC:44407]
NR_033350	GOLGA8R	golgin A8 family member R [Source:HGNC Symbol-3BAcc:HGNC:44407]
NR_033353	GOLGA8R	golgin A8 family member R [Source:HGNC Symbol-3BAcc:HGNC:44407]
lnc-HSP90B1-3:1	GPI	glucose-6-phosphate isomerase [Source:HGNC Symbol-3BAcc:HGNC:4458]
NONHSAT089168	GPR155	G protein-coupled receptor 155 [Source:HGNC Symbol-3BAcc:HGNC:22951]
NONHSAT089168	GRK3	G protein-coupled receptor kinase 3 [Source:HGNC Symbol-3BAcc:HGNC:290]
NR_015451	GRK3	G protein-coupled receptor kinase 3 [Source:HGNC Symbol-3BAcc:HGNC:290]
lnc-MUC20-9:1	GRM6	glutamate metabotropic receptor 6 [Source:HGNC Symbol-3BAcc:HGNC:4598]
NR_034072	GRM6	glutamate metabotropic receptor 6 [Source:HGNC Symbol-3BAcc:HGNC:4598]
lnc-HSP90B1-3:1	GSDMA	gasdermin A [Source:HGNC Symbol-3BAcc:HGNC:13311]
lnc-SCD-1:8	GSDMB	gasdermin B [Source:HGNC Symbol-3BAcc:HGNC:23690]
NONHSAT089168	GTF2H5	general transcription factor IIH subunit 5 [Source:HGNC Symbol-3BAcc:HGNC:21157]
lnc-MUC20-9:1	HEATR5A	HEAT repeat containing 5A [Source:HGNC Symbol-3BAcc:HGNC:20276]
lnc-MUC20-9:1	HIP1	huntingtin interacting protein 1 [Source:HGNC Symbol-3BAcc:HGNC:4913]
NONHSAT089168	HMGB1	high mobility group box 1 [Source:HGNC Symbol-3BAcc:HGNC:4983]
NR_015451	HMGB1	high mobility group box 1 [Source:HGNC Symbol-3BAcc:HGNC:4983]
NR_015451	HOMEZ	homeobox and leucine zipper encoding [Source:HGNC Symbol-3BAcc:HGNC:20164]
lnc-MUC20-9:1	HOOK3	hook microtubule-tethering protein 3 [Source:HGNC Symbol-3BAcc:HGNC:23576]
NR_015451	HOOK3	hook microtubule-tethering protein 3 [Source:HGNC Symbol-3BAcc:HGNC:23576]
NONHSAT089168	ICA1L	islet cell autoantigen 1 like [Source:HGNC Symbol-3BAcc:HGNC:14442]
NR_015451	ICA1L	islet cell autoantigen 1 like [Source:HGNC Symbol-3BAcc:HGNC:14442]
NONHSAT089168	IDO1	indoleamine 2-2C3-dioxygenase 1 [Source:HGNC Symbol-3BAcc:HGNC:6059]
NR_015451	IDO1	indoleamine 2-2C3-dioxygenase 1 [Source:HGNC Symbol-3BAcc:HGNC:6059]
lnc-MUC20-9:1	IDS	iduronate 2-sulfatase [Source:HGNC Symbol-3BAcc:HGNC:5389]
NR_034072	IDS	iduronate 2-sulfatase [Source:HGNC Symbol-3BAcc:HGNC:5389]
NONHSAT089168	IFIT3	interferon induced protein with tetratricopeptide repeats 3 [Source:HGNC Symbol-3BAcc:HGNC:5411]
NR_015451	IFIT3	interferon induced protein with tetratricopeptide repeats 3 [Source:HGNC Symbol-3BAcc:HGNC:5411]
lnc-MUC20-9:1	IKZF3	IKAROS family zinc finger 3 [Source:HGNC Symbol-3BAcc:HGNC:13178]
NONHSAT089168	IKZF3	IKAROS family zinc finger 3 [Source:HGNC Symbol-3BAcc:HGNC:13178]
NR_015451	INMT	indolethylamine N-methyltransferase [Source:HGNC Symbol-3BAcc:HGNC:6069]
NONHSAT089168	IRF1	interferon regulatory factor 1 [Source:HGNC Symbol-3BAcc:HGNC:6116]
NR_015451	IRF1	interferon regulatory factor 1 [Source:HGNC Symbol-3BAcc:HGNC:6116]
lnc-MUC20-9:1	IRGQ	immunity-related GTPase Q [Source:HGNC Symbol-3BAcc:HGNC:24868]
NR_015451	ISG20L2	interferon stimulated exonuclease gene 20 like 2 [Source:HGNC Symbol-3BAcc:HGNC:25745]
NONHSAT089168	ISPD	isoprenoid synthase domain containing [Source:HGNC Symbol-3BAcc:HGNC:37276]
NR_015451	ISPD	isoprenoid synthase domain containing [Source:HGNC Symbol-3BAcc:HGNC:37276]
lnc-HSP90B1-3:1	ITGAX	integrin subunit alpha X [Source:HGNC Symbol-3BAcc:HGNC:6152]
NR_015451	JAK3	Janus kinase 3 [Source:HGNC Symbol-3BAcc:HGNC:6193]
NONHSAT089168	KCNA7	potassium voltage-gated channel subfamily A member 7 [Source:HGNC Symbol-3BAcc:HGNC:6226]
NR_015451	KCNA7	potassium voltage-gated channel subfamily A member 7 [Source:HGNC Symbol-3BAcc:HGNC:6226]
NONHSAT089168	KCNH6	potassium voltage-gated channel subfamily H member 6 [Source:HGNC Symbol-3BAcc:HGNC:18862]
NONHSAT089168	KCNJ5	potassium voltage-gated channel subfamily J member 5 [Source:HGNC Symbol-3BAcc:HGNC:6266]
NR_015451	KCNJ5	potassium voltage-gated channel subfamily J member 5 [Source:HGNC Symbol-3BAcc:HGNC:6266]
lnc-MUC20-9:1	KDELC2	KDEL motif containing 2 [Source:HGNC Symbol-3BAcc:HGNC:28496]
NONHSAT089168	KIAA0101	KIAA0101 [Source:HGNC Symbol-3BAcc:HGNC:28961]
lnc-MUC20-9:1	KIAA0355	KIAA0355 [Source:HGNC Symbol-3BAcc:HGNC:29016]
NR_034072	KIAA0355	KIAA0355 [Source:HGNC Symbol-3BAcc:HGNC:29016]
lnc-MUC20-9:1	KIAA0408	KIAA0408 [Source:HGNC Symbol-3BAcc:HGNC:21636]
NONHSAT089168	KIAA0408	KIAA0408 [Source:HGNC Symbol-3BAcc:HGNC:21636]
NR_015451	KIAA1324	KIAA1324 [Source:HGNC Symbol-3BAcc:HGNC:29618]
lnc-MUC20-9:1	KIAA1715	KIAA1715 [Source:HGNC Symbol-3BAcc:HGNC:21610]
NR_015451	KIF18B	kinesin family member 18B [Source:HGNC Symbol-3BAcc:HGNC:27102]
NONHSAT089168	KIF1C	kinesin family member 1C [Source:HGNC Symbol-3BAcc:HGNC:6317]
NR_015451	KIF1C	kinesin family member 1C [Source:HGNC Symbol-3BAcc:HGNC:6317]
lnc-HSP90B1-3:1	KIF3A	kinesin family member 3A [Source:HGNC Symbol-3BAcc:HGNC:6319]
NR_034072	KIF3A	kinesin family member 3A [Source:HGNC Symbol-3BAcc:HGNC:6319]
lnc-MUC20-9:1	KPNA6	karyopherin subunit alpha 6 [Source:HGNC Symbol-3BAcc:HGNC:6399]
NR_015451	KREMEN1	kringle containing transmembrane protein 1 [Source:HGNC Symbol-3BAcc:HGNC:17550]
NR_015451	L1TD1	LINE-1 type transposase domain containing 1 [Source:HGNC Symbol-3BAcc:HGNC:25595]
NR_015451	LDLR	low density lipoprotein receptor [Source:HGNC Symbol-3BAcc:HGNC:6547]
lnc-HSP90B1-3:1	LETM1	leucine zipper and EF-hand containing transmembrane protein 1 [Source:HGNC Symbol-3BAcc:HGNC:6556]
NR_015451	LILRB3	leukocyte immunoglobulin like receptor B3 [Source:HGNC Symbol-3BAcc:HGNC:6607]
NONHSAT089168	LIMS1	LIM zinc finger domain containing 1 [Source:HGNC Symbol-3BAcc:HGNC:6616]
NR_015451	LIMS1	LIM zinc finger domain containing 1 [Source:HGNC Symbol-3BAcc:HGNC:6616]
lnc-ASB7-5:1	LINS1	lines homolog 1 [Source:HGNC Symbol-3BAcc:HGNC:30922]
NR_015451	LIX1L	limb and CNS expressed 1 like [Source:HGNC Symbol-3BAcc:HGNC:28715]
lnc-MUC20-9:1	LPP	LIM domain containing preferred translocation partner in lipoma [Source:HGNC Symbol-3BAcc:HGNC:6679]
NONHSAT089168	LPP	LIM domain containing preferred translocation partner in lipoma [Source:HGNC Symbol-3BAcc:HGNC:6679]
NR_015451	LPP	LIM domain containing preferred translocation partner in lipoma [Source:HGNC Symbol-3BAcc:HGNC:6679]
NONHSAT089168	LRAT	lecithin retinol acyltransferase (phosphatidylcholine--retinol O-acyltransferase) [Source:HGNC Symbol-3BAcc:HGNC:6685]
NONHSAT089168	LRRC27	leucine rich repeat containing 27 [Source:HGNC Symbol-3BAcc:HGNC:29346]
NR_015451	LRRC27	leucine rich repeat containing 27 [Source:HGNC Symbol-3BAcc:HGNC:29346]
NR_015451	LRRC28	leucine rich repeat containing 28 [Source:HGNC Symbol-3BAcc:HGNC:28355]
NONHSAT089168	LRRC58	leucine rich repeat containing 58 [Source:HGNC Symbol-3BAcc:HGNC:26968]
NR_015451	LRRC58	leucine rich repeat containing 58 [Source:HGNC Symbol-3BAcc:HGNC:26968]
NR_015451	LRRN4CL	LRRN4 C-terminal like [Source:HGNC Symbol-3BAcc:HGNC:33724]
lnc-MUC20-9:1	LSG1	large 60S subunit nuclear export GTPase 1 [Source:HGNC Symbol-3BAcc:HGNC:25652]
NR_015451	LSM11	LSM11-2C U7 small nuclear RNA associated [Source:HGNC Symbol-3BAcc:HGNC:30860]
lnc-MUC20-9:1	LYRM7	LYR motif containing 7 [Source:HGNC Symbol-3BAcc:HGNC:28072]
NR_034072	LYRM7	LYR motif containing 7 [Source:HGNC Symbol-3BAcc:HGNC:28072]
NR_015451	LYZ	lysozyme [Source:HGNC Symbol-3BAcc:HGNC:6740]
NONHSAT089168	MANEAL	mannosidase endo-alpha like [Source:HGNC Symbol-3BAcc:HGNC:26452]
NR_015451	MANEAL	mannosidase endo-alpha like [Source:HGNC Symbol-3BAcc:HGNC:26452]
lnc-HSP90B1-3:1	MBOAT1	membrane bound O-acyltransferase domain containing 1 [Source:HGNC Symbol-3BAcc:HGNC:21579]
NR_015451	MBOAT1	membrane bound O-acyltransferase domain containing 1 [Source:HGNC Symbol-3BAcc:HGNC:21579]
NR_015451	MDM4	MDM4-2C p53 regulator [Source:HGNC Symbol-3BAcc:HGNC:6974]
lnc-HSP90B1-3:1	ME2	malic enzyme 2 [Source:HGNC Symbol-3BAcc:HGNC:6984]
NONHSAT089168	MEAF6	MYST/Esa1 associated factor 6 [Source:HGNC Symbol-3BAcc:HGNC:25674]
lnc-HSP90B1-3:1	MEFV	Mediterranean fever [Source:HGNC Symbol-3BAcc:HGNC:6998]
lnc-MUC20-9:1	METTL21A	methyltransferase like 21A [Source:HGNC Symbol-3BAcc:HGNC:30476]
NR_015451	MGAT4A	mannosyl (alpha-1-2C3-)-glycoprotein beta-1-2C4-N-acetylglucosaminyltransferase-2C isozyme A [Source:HGNC Symbol-3BAcc:HGNC:7047]
lnc-HSP90B1-3:1	MICB	MHC class I polypeptide-related sequence B [Source:HGNC Symbol-3BAcc:HGNC:7091]
lnc-HSP90B1-3:1	MOB1A	MOB kinase activator 1A [Source:HGNC Symbol-3BAcc:HGNC:16015]
NONHSAT089168	MRI1	methylthioribose-1-phosphate isomerase 1 [Source:HGNC Symbol-3BAcc:HGNC:28469]
NR_015451	MRI1	methylthioribose-1-phosphate isomerase 1 [Source:HGNC Symbol-3BAcc:HGNC:28469]
NR_038275	MRO	maestro [Source:HGNC Symbol-3BAcc:HGNC:24121]
lnc-HSP90B1-3:1	MRPL30	mitochondrial ribosomal protein L30 [Source:HGNC Symbol-3BAcc:HGNC:14036]
lnc-HSP90B1-3:1	MS4A10	membrane spanning 4-domains A10 [Source:HGNC Symbol-3BAcc:HGNC:13368]
NR_015451	MTFMT	mitochondrial methionyl-tRNA formyltransferase [Source:HGNC Symbol-3BAcc:HGNC:29666]
NONHSAT089168	MTG2	mitochondrial ribosome associated GTPase 2 [Source:HGNC Symbol-3BAcc:HGNC:16239]
NR_015451	MTG2	mitochondrial ribosome associated GTPase 2 [Source:HGNC Symbol-3BAcc:HGNC:16239]
NONHSAT089168	MTMR9	myotubularin related protein 9 [Source:HGNC Symbol-3BAcc:HGNC:14596]
NR_015451	MTMR9	myotubularin related protein 9 [Source:HGNC Symbol-3BAcc:HGNC:14596]
lnc-MUC20-9:1	NKD1	naked cuticle homolog 1 [Source:HGNC Symbol-3BAcc:HGNC:17045]
lnc-MUC20-9:1	NLRP12	NLR family pyrin domain containing 12 [Source:HGNC Symbol-3BAcc:HGNC:22938]
NONHSAT089168	NLRP12	NLR family pyrin domain containing 12 [Source:HGNC Symbol-3BAcc:HGNC:22938]
lnc-MUC20-9:1	NMNAT1	nicotinamide nucleotide adenylyltransferase 1 [Source:HGNC Symbol-3BAcc:HGNC:17877]
lnc-MUC20-9:1	NMT2	N-myristoyltransferase 2 [Source:HGNC Symbol-3BAcc:HGNC:7858]
NONHSAT089168	NOL9	nucleolar protein 9 [Source:HGNC Symbol-3BAcc:HGNC:26265]
NR_015451	NRIP3	nuclear receptor interacting protein 3 [Source:HGNC Symbol-3BAcc:HGNC:1167]
NR_038275	NUAK2	NUAK family kinase 2 [Source:HGNC Symbol-3BAcc:HGNC:29558]
lnc-MUC20-9:1	NUDC	nudC nuclear distribution protein [Source:HGNC Symbol-3BAcc:HGNC:8045]
NR_015451	OPRM1	opioid receptor mu 1 [Source:HGNC Symbol-3BAcc:HGNC:8156]
lnc-HSP90B1-3:1	OR7D2	olfactory receptor family 7 subfamily D member 2 [Source:HGNC Symbol-3BAcc:HGNC:8378]
lnc-HSP90B1-3:1	ORAI2	ORAI calcium release-activated calcium modulator 2 [Source:HGNC Symbol-3BAcc:HGNC:21667]
NONHSAT089168	ORAI2	ORAI calcium release-activated calcium modulator 2 [Source:HGNC Symbol-3BAcc:HGNC:21667]
NONHSAT089168	P3H4	prolyl 3-hydroxylase family member 4 (non-enzymatic) [Source:HGNC Symbol-3BAcc:HGNC:16946]
lnc-MUC20-9:1	PAG1	phosphoprotein membrane anchor with glycosphingolipid microdomains 1 [Source:HGNC Symbol-3BAcc:HGNC:30043]
NR_015451	PCDH11Y	protocadherin 11 Y-linked [Source:HGNC Symbol-3BAcc:HGNC:15813]
lnc-MUC20-9:1	PDDC1	Parkinson disease 7 domain containing 1 [Source:HGNC Symbol-3BAcc:HGNC:26616]
NR_015451	PDDC1	Parkinson disease 7 domain containing 1 [Source:HGNC Symbol-3BAcc:HGNC:26616]
NR_034072	PDDC1	Parkinson disease 7 domain containing 1 [Source:HGNC Symbol-3BAcc:HGNC:26616]
lnc-MUC20-9:1	PDE4C	phosphodiesterase 4C [Source:HGNC Symbol-3BAcc:HGNC:8782]
lnc-MUC20-9:1	PDE6A	phosphodiesterase 6A [Source:HGNC Symbol-3BAcc:HGNC:8785]
NR_034072	PDE6A	phosphodiesterase 6A [Source:HGNC Symbol-3BAcc:HGNC:8785]
lnc-MUC20-9:1	PDP2	pyruvate dehyrogenase phosphatase catalytic subunit 2 [Source:HGNC Symbol-3BAcc:HGNC:30263]
NR_015451	PEX13	peroxisomal biogenesis factor 13 [Source:HGNC Symbol-3BAcc:HGNC:8855]
NR_038275	PGAM5	PGAM family member 5-2C mitochondrial serine/threonine protein phosphatase [Source:HGNC Symbol-3BAcc:HGNC:28763]
lnc-MUC20-9:1	PGM2L1	phosphoglucomutase 2-like 1 [Source:HGNC Symbol-3BAcc:HGNC:20898]
lnc-MUC20-9:1	PGPEP1	pyroglutamyl-peptidase I [Source:HGNC Symbol-3BAcc:HGNC:13568]
NONHSAT089168	PHACTR4	phosphatase and actin regulator 4 [Source:HGNC Symbol-3BAcc:HGNC:25793]
NR_015451	PIGC	phosphatidylinositol glycan anchor biosynthesis class C [Source:HGNC Symbol-3BAcc:HGNC:8960]
NR_015451	PIGR	polymeric immunoglobulin receptor [Source:HGNC Symbol-3BAcc:HGNC:8968]
NONHSAT089168	PIGX	phosphatidylinositol glycan anchor biosynthesis class X [Source:HGNC Symbol-3BAcc:HGNC:26046]
NR_015451	PIGX	phosphatidylinositol glycan anchor biosynthesis class X [Source:HGNC Symbol-3BAcc:HGNC:26046]
NR_034072	PIPOX	pipecolic acid and sarcosine oxidase [Source:HGNC Symbol-3BAcc:HGNC:17804]
NONHSAT089168	PLCXD1	phosphatidylinositol specific phospholipase C X domain containing 1 [Source:HGNC Symbol-3BAcc:HGNC:23148]
NR_015451	PLEKHB2	pleckstrin homology domain containing B2 [Source:HGNC Symbol-3BAcc:HGNC:19236]
lnc-HSP90B1-3:1	PLEKHG5	pleckstrin homology and RhoGEF domain containing G5 [Source:HGNC Symbol-3BAcc:HGNC:29105]
lnc-MUC20-9:1	PLXDC1	plexin domain containing 1 [Source:HGNC Symbol-3BAcc:HGNC:20945]
NR_038275	PNMA2	paraneoplastic Ma antigen 2 [Source:HGNC Symbol-3BAcc:HGNC:9159]
lnc-HSP90B1-3:1	PNPO	pyridoxamine 5'-phosphate oxidase [Source:HGNC Symbol-3BAcc:HGNC:30260]
lnc-MUC20-9:1	PNPT1	polyribonucleotide nucleotidyltransferase 1 [Source:HGNC Symbol-3BAcc:HGNC:23166]
NR_034072	PNPT1	polyribonucleotide nucleotidyltransferase 1 [Source:HGNC Symbol-3BAcc:HGNC:23166]
NR_015451	POC1B-GALNT4	POC1B-GALNT4 readthrough [Source:HGNC Symbol-3BAcc:HGNC:42957]
NONHSAT089168	POFUT1	protein O-fucosyltransferase 1 [Source:HGNC Symbol-3BAcc:HGNC:14988]
NONHSAT089168	POLH	polymerase (DNA) eta [Source:HGNC Symbol-3BAcc:HGNC:9181]
NR_015451	POLH	polymerase (DNA) eta [Source:HGNC Symbol-3BAcc:HGNC:9181]
NR_015451	PPIL6	peptidylprolyl isomerase like 6 [Source:HGNC Symbol-3BAcc:HGNC:21557]
NR_015451	PPP1R12B	protein phosphatase 1 regulatory subunit 12B [Source:HGNC Symbol-3BAcc:HGNC:7619]
NR_015451	PPP1R3B	protein phosphatase 1 regulatory subunit 3B [Source:HGNC Symbol-3BAcc:HGNC:14942]
NR_038275	PSTPIP2	proline-serine-threonine phosphatase interacting protein 2 [Source:HGNC Symbol-3BAcc:HGNC:9581]
NONHSAT089168	PTK6	protein tyrosine kinase 6 [Source:HGNC Symbol-3BAcc:HGNC:9617]
NR_034072	QPRT	quinolinate phosphoribosyltransferase [Source:HGNC Symbol-3BAcc:HGNC:9755]
NR_015451	RAB21	RAB21-2C member RAS oncogene family [Source:HGNC Symbol-3BAcc:HGNC:18263]
NONHSAT089168	RAB27A	RAB27A-2C member RAS oncogene family [Source:HGNC Symbol-3BAcc:HGNC:9766]
NONHSAT089168	RAB3B	RAB3B-2C member RAS oncogene family [Source:HGNC Symbol-3BAcc:HGNC:9778]
NR_015451	RAB3B	RAB3B-2C member RAS oncogene family [Source:HGNC Symbol-3BAcc:HGNC:9778]
NR_038275	RASGRP4	RAS guanyl releasing protein 4 [Source:HGNC Symbol-3BAcc:HGNC:18958]
lnc-MUC20-9:1	RBBP5	RB binding protein 5-2C histone lysine methyltransferase complex subunit [Source:HGNC Symbol-3BAcc:HGNC:9888]
lnc-MUC20-9:1	RBM3	RNA binding motif (RNP1-2C RRM) protein 3 [Source:HGNC Symbol-3BAcc:HGNC:9900]
NONHSAT089168	RBM41	RNA binding motif protein 41 [Source:HGNC Symbol-3BAcc:HGNC:25617]
NR_015451	RBM41	RNA binding motif protein 41 [Source:HGNC Symbol-3BAcc:HGNC:25617]
NONHSAT089168	RBM43	RNA binding motif protein 43 [Source:HGNC Symbol-3BAcc:HGNC:24790]
NR_015451	RBM43	RNA binding motif protein 43 [Source:HGNC Symbol-3BAcc:HGNC:24790]
lnc-HSP90B1-3:1	RBMS2	RNA binding motif single stranded interacting protein 2 [Source:HGNC Symbol-3BAcc:HGNC:9909]
NR_038275	RBMS2	RNA binding motif single stranded interacting protein 2 [Source:HGNC Symbol-3BAcc:HGNC:9909]
lnc-HSP90B1-3:1	RD3	retinal degeneration 3 [Source:HGNC Symbol-3BAcc:HGNC:19689]
lnc-HSP90B1-3:1	REEP3	receptor accessory protein 3 [Source:HGNC Symbol-3BAcc:HGNC:23711]
NR_038275	REL	REL proto-oncogene-2C NF-kB subunit [Source:HGNC Symbol-3BAcc:HGNC:9954]
lnc-HSP90B1-3:1	RLIM	ring finger protein-2C LIM domain interacting [Source:HGNC Symbol-3BAcc:HGNC:13429]
lnc-MUC20-9:1	RNF14	ring finger protein 14 [Source:HGNC Symbol-3BAcc:HGNC:10058]
NONHSAT089168	RNF14	ring finger protein 14 [Source:HGNC Symbol-3BAcc:HGNC:10058]
NR_015451	RNF14	ring finger protein 14 [Source:HGNC Symbol-3BAcc:HGNC:10058]
NR_015451	RNF157	ring finger protein 157 [Source:HGNC Symbol-3BAcc:HGNC:29402]
NONHSAT089168	RNF41	ring finger protein 41 [Source:HGNC Symbol-3BAcc:HGNC:18401]
NR_015451	RNF41	ring finger protein 41 [Source:HGNC Symbol-3BAcc:HGNC:18401]
lnc-MUC20-9:1	RPL36A	ribosomal protein L36a [Source:HGNC Symbol-3BAcc:HGNC:10359]
lnc-MUC20-9:1	RRP7A	ribosomal RNA processing 7 homolog A [Source:HGNC Symbol-3BAcc:HGNC:24286]
NONHSAT089168	RRP7A	ribosomal RNA processing 7 homolog A [Source:HGNC Symbol-3BAcc:HGNC:24286]
lnc-HSP90B1-3:1	RTCA	RNA 3'-terminal phosphate cyclase [Source:HGNC Symbol-3BAcc:HGNC:17981]
lnc-MUC20-9:1	RUBCN	RUN and cysteine rich domain containing beclin 1 interacting protein [Source:HGNC Symbol-3BAcc:HGNC:28991]
NONHSAT089168	RUNDC1	RUN domain containing 1 [Source:HGNC Symbol-3BAcc:HGNC:25418]
NR_015451	RUNDC1	RUN domain containing 1 [Source:HGNC Symbol-3BAcc:HGNC:25418]
NONHSAT089168	SBNO1	strawberry notch homolog 1 (Drosophila) [Source:HGNC Symbol-3BAcc:HGNC:22973]
NR_015451	SBNO1	strawberry notch homolog 1 (Drosophila) [Source:HGNC Symbol-3BAcc:HGNC:22973]
NONHSAT089168	SCAMP1	secretory carrier membrane protein 1 [Source:HGNC Symbol-3BAcc:HGNC:10563]
NR_015451	SCAMP1	secretory carrier membrane protein 1 [Source:HGNC Symbol-3BAcc:HGNC:10563]
lnc-HSP90B1-3:1	SCARF1	scavenger receptor class F member 1 [Source:HGNC Symbol-3BAcc:HGNC:16820]
NR_015451	SEMA3E	semaphorin 3E [Source:HGNC Symbol-3BAcc:HGNC:10727]
NONHSAT089168	SEMA4F	ssemaphorin 4F [Source:HGNC Symbol-3BAcc:HGNC:10734]
NR_015451	SEMA4F	ssemaphorin 4F [Source:HGNC Symbol-3BAcc:HGNC:10734]
NR_015451	SERPINB9	serpin family B member 9 [Source:HGNC Symbol-3BAcc:HGNC:8955]
lnc-HSP90B1-3:1	SFXN1	sideroflexin 1 [Source:HGNC Symbol-3BAcc:HGNC:16085]
NONHSAT089168	SGPP2	sphingosine-1-phosphate phosphatase 2 [Source:HGNC Symbol-3BAcc:HGNC:19953]
lnc-MUC20-9:1	SGSM1	small G protein signaling modulator 1 [Source:HGNC Symbol-3BAcc:HGNC:29410]
NR_034072	SGSM1	small G protein signaling modulator 1 [Source:HGNC Symbol-3BAcc:HGNC:29410]
lnc-HSP90B1-3:1	SGTB	small glutamine rich tetratricopeptide repeat containing beta [Source:HGNC Symbol-3BAcc:HGNC:23567]
NONHSAT089168	SHROOM1	shroom family member 1 [Source:HGNC Symbol-3BAcc:HGNC:24084]
NR_015451	SHROOM1	shroom family member 1 [Source:HGNC Symbol-3BAcc:HGNC:24084]
NR_015451	SKA1	spindle and kinetochore associated complex subunit 1 [Source:HGNC Symbol-3BAcc:HGNC:28109]
NONHSAT089168	SLC12A6	solute carrier family 12 member 6 [Source:HGNC Symbol-3BAcc:HGNC:10914]
NR_015451	SLC12A6	solute carrier family 12 member 6 [Source:HGNC Symbol-3BAcc:HGNC:10914]
NONHSAT089168	SLC14A2	solute carrier family 14 member 2 [Source:HGNC Symbol-3BAcc:HGNC:10919]
NR_015451	SLC14A2	solute carrier family 14 member 2 [Source:HGNC Symbol-3BAcc:HGNC:10919]
lnc-MUC20-9:1	SLC25A15	solute carrier family 25 member 15 [Source:HGNC Symbol-3BAcc:HGNC:10985]
NONHSAT089168	SLC26A4	solute carrier family 26 member 4 [Source:HGNC Symbol-3BAcc:HGNC:8818]
NR_015451	SLC26A4	solute carrier family 26 member 4 [Source:HGNC Symbol-3BAcc:HGNC:8818]
lnc-MUC20-9:1	SLC31A1	solute carrier family 31 member 1 [Source:HGNC Symbol-3BAcc:HGNC:11016]
NR_034072	SLC35B4	solute carrier family 35 member B4 [Source:HGNC Symbol-3BAcc:HGNC:20584]
NONHSAT089168	SLC43A2	solute carrier family 43 member 2 [Source:HGNC Symbol-3BAcc:HGNC:23087]
NR_015451	SLC43A2	solute carrier family 43 member 2 [Source:HGNC Symbol-3BAcc:HGNC:23087]
NR_015451	SLC4A8	solute carrier family 4 member 8 [Source:HGNC Symbol-3BAcc:HGNC:11034]
lnc-MUC20-9:1	SLC6A4	solute carrier family 6 member 4 [Source:HGNC Symbol-3BAcc:HGNC:11050]
lnc-HSP90B1-3:1	SMAD9	SMAD family member 9 [Source:HGNC Symbol-3BAcc:HGNC:6774]
NR_015451	SMG1	SMG1-2C nonsense mediated mRNA decay associated PI3K related kinase [Source:HGNC Symbol-3BAcc:HGNC:30045]
NONHSAT089168	SMYD4	SET and MYND domain containing 4 [Source:HGNC Symbol-3BAcc:HGNC:21067]
NR_015451	SMYD4	SET and MYND domain containing 4 [Source:HGNC Symbol-3BAcc:HGNC:21067]
NR_034072	SMYD4	SET and MYND domain containing 4 [Source:HGNC Symbol-3BAcc:HGNC:21067]
lnc-MUC20-9:1	SNAP29	synaptosome associated protein 29 [Source:HGNC Symbol-3BAcc:HGNC:11133]
NONHSAT089168	SNAP29	synaptosome associated protein 29 [Source:HGNC Symbol-3BAcc:HGNC:11133]
NR_015451	SNAP29	synaptosome associated protein 29 [Source:HGNC Symbol-3BAcc:HGNC:11133]
lnc-HSP90B1-3:1	SNTB2	syntrophin beta 2 [Source:HGNC Symbol-3BAcc:HGNC:11169]
lnc-MUC20-9:1	SOGA3	SOGA family member 3 [Source:HGNC Symbol-3BAcc:HGNC:21494]
NONHSAT089168	SOGA3	SOGA family member 3 [Source:HGNC Symbol-3BAcc:HGNC:21494]
lnc-MUC20-9:1	SPATA5	spermatogenesis associated 5 [Source:HGNC Symbol-3BAcc:HGNC:18119]
NONHSAT089168	SPATA5	spermatogenesis associated 5 [Source:HGNC Symbol-3BAcc:HGNC:18119]
NR_015451	SPATA5	spermatogenesis associated 5 [Source:HGNC Symbol-3BAcc:HGNC:18119]
NR_015451	SPATS2L	spermatogenesis associated serine rich 2 like [Source:HGNC Symbol-3BAcc:HGNC:24574]
lnc-MUC20-9:1	SPIB	Spi-B transcription factor [Source:HGNC Symbol-3BAcc:HGNC:11242]
lnc-MUC20-9:1	SPPL3	signal peptide peptidase like 3 [Source:HGNC Symbol-3BAcc:HGNC:30424]
NR_038275	SPRED1	sprouty related EVH1 domain containing 1 [Source:HGNC Symbol-3BAcc:HGNC:20249]
NR_034072	SPTLC2	serine palmitoyltransferase long chain base subunit 2 [Source:HGNC Symbol-3BAcc:HGNC:11278]
NR_015451	ST8SIA4	ST8 alpha-N-acetyl-neuraminide alpha-2-2C8-sialyltransferase 4 [Source:HGNC Symbol-3BAcc:HGNC:10871]
NR_034072	STRIP2	striatin interacting protein 2 [Source:HGNC Symbol-3BAcc:HGNC:22209]
lnc-MUC20-9:1	SUGP2	SURP and G-patch domain containing 2 [Source:HGNC Symbol-3BAcc:HGNC:18641]
NR_015451	SVOP	SV2 related protein [Source:HGNC Symbol-3BAcc:HGNC:25417]
NR_015451	TADA3	transcriptional adaptor 3 [Source:HGNC Symbol-3BAcc:HGNC:19422]
lnc-MUC20-9:1	TAF8	TATA-box binding protein associated factor 8 [Source:HGNC Symbol-3BAcc:HGNC:17300]
NR_034072	TAF8	TATA-box binding protein associated factor 8 [Source:HGNC Symbol-3BAcc:HGNC:17300]
NONHSAT089168	TBC1D15	TBC1 domain family member 15 [Source:HGNC Symbol-3BAcc:HGNC:25694]
NR_015451	TBC1D15	TBC1 domain family member 15 [Source:HGNC Symbol-3BAcc:HGNC:25694]
NR_015451	TBC1D24	TBC1 domain family member 24 [Source:HGNC Symbol-3BAcc:HGNC:29203]
lnc-MUC20-9:1	TCF7	transcription factor 7 (T-cell specific-2C HMG-box) [Source:HGNC Symbol-3BAcc:HGNC:11639]
lnc-HSP90B1-3:1	TERF2	telomeric repeat binding factor 2 [Source:HGNC Symbol-3BAcc:HGNC:11729]
lnc-HSP90B1-3:1	THAP5	THAP domain containing 5 [Source:HGNC Symbol-3BAcc:HGNC:23188]
NR_015451	TIGAR	TP53 induced glycolysis regulatory phosphatase [Source:HGNC Symbol-3BAcc:HGNC:1185]
NONHSAT089168	TLR10	toll like receptor 10 [Source:HGNC Symbol-3BAcc:HGNC:15634]
NR_015451	TMEM130	transmembrane protein 130 [Source:HGNC Symbol-3BAcc:HGNC:25429]
NR_034072	TMEM213	transmembrane protein 213 [Source:HGNC Symbol-3BAcc:HGNC:27220]
lnc-MUC20-9:1	TMF1	TATA element modulatory factor 1 [Source:HGNC Symbol-3BAcc:HGNC:11870]
NR_034072	TNFAIP8L1	TNF alpha induced protein 8 like 1 [Source:HGNC Symbol-3BAcc:HGNC:28279]
NONHSAT089168	TONSL	tonsoku-like-2C DNA repair protein [Source:HGNC Symbol-3BAcc:HGNC:7801]
NR_015451	TONSL	tonsoku-like-2C DNA repair protein [Source:HGNC Symbol-3BAcc:HGNC:7801]
NR_015451	TOR1AIP2	torsin 1A interacting protein 2 [Source:HGNC Symbol-3BAcc:HGNC:24055]
lnc-HSP90B1-3:1	TOX4	TOX high mobility group box family member 4 [Source:HGNC Symbol-3BAcc:HGNC:20161]
lnc-MUC20-9:1	TPM3	tropomyosin 3 [Source:HGNC Symbol-3BAcc:HGNC:12012]
lnc-MUC20-9:1	TRAF3IP2	TRAF3 interacting protein 2 [Source:HGNC Symbol-3BAcc:HGNC:1343]
NONHSAT089168	TRAF3IP2	TRAF3 interacting protein 2 [Source:HGNC Symbol-3BAcc:HGNC:1343]
NR_015451	TRAF3IP2	TRAF3 interacting protein 2 [Source:HGNC Symbol-3BAcc:HGNC:1343]
lnc-HSP90B1-3:1	TRIM45	tripartite motif containing 45 [Source:HGNC Symbol-3BAcc:HGNC:19018]
NONHSAT089168	TRIM52	tripartite motif containing 52 [Source:HGNC Symbol-3BAcc:HGNC:19024]
NR_015451	TRIM58	tripartite motif containing 58 [Source:HGNC Symbol-3BAcc:HGNC:24150]
lnc-MUC20-9:1	TRIM65	tripartite motif containing 65 [Source:HGNC Symbol-3BAcc:HGNC:27316]
lnc-MUC20-9:1	TRMT2B	tRNA methyltransferase 2 homolog B [Source:HGNC Symbol-3BAcc:HGNC:25748]
lnc-MUC20-9:1	TSNAX	translin associated factor X [Source:HGNC Symbol-3BAcc:HGNC:12380]
lnc-MUC20-9:1	TSPAN14	tetraspanin 14 [Source:HGNC Symbol-3BAcc:HGNC:23303]
lnc-HSP90B1-3:1	TTC39C	tetratricopeptide repeat domain 39C [Source:HGNC Symbol-3BAcc:HGNC:26595]
NONHSAT089168	TUBD1	tubulin delta 1 [Source:HGNC Symbol-3BAcc:HGNC:16811]
lnc-HSP90B1-3:1	TUFT1	tuftelin 1 [Source:HGNC Symbol-3BAcc:HGNC:12422]
NONHSAT089168	UBE2G2	ubiquitin conjugating enzyme E2 G2 [Source:HGNC Symbol-3BAcc:HGNC:12483]
NR_015451	UBIAD1	UbiA prenyltransferase domain containing 1 [Source:HGNC Symbol-3BAcc:HGNC:30791]
NR_015451	UBN2	ubinuclein 2 [Source:HGNC Symbol-3BAcc:HGNC:21931]
lnc-MUC20-9:1	UBOX5	U-box domain containing 5 [Source:HGNC Symbol-3BAcc:HGNC:17777]
lnc-HSP90B1-3:1	UGGT1	UDP-glucose glycoprotein glucosyltransferase 1 [Source:HGNC Symbol-3BAcc:HGNC:15663]
NR_034072	UGGT1	UDP-glucose glycoprotein glucosyltransferase 1 [Source:HGNC Symbol-3BAcc:HGNC:15663]
lnc-HSP90B1-3:1	VPS53	VPS53-2C GARP complex subunit [Source:HGNC Symbol-3BAcc:HGNC:25608]
NR_034072	VSIG1	V-set and immunoglobulin domain containing 1 [Source:HGNC Symbol-3BAcc:HGNC:28675]
NONHSAT089168	VSTM4	V-set and transmembrane domain containing 4 [Source:HGNC Symbol-3BAcc:HGNC:26470]
NR_015451	VSTM4	V-set and transmembrane domain containing 4 [Source:HGNC Symbol-3BAcc:HGNC:26470]
lnc-MUC20-9:1	WDR31	WD repeat domain 31 [Source:HGNC Symbol-3BAcc:HGNC:21421]
NR_015451	WDR31	WD repeat domain 31 [Source:HGNC Symbol-3BAcc:HGNC:21421]
NONHSAT089168	WDR45	WD repeat domain 45 [Source:HGNC Symbol-3BAcc:HGNC:28912]
NR_015451	WDR45	WD repeat domain 45 [Source:HGNC Symbol-3BAcc:HGNC:28912]
NONHSAT089168	XIAP	X-linked inhibitor of apoptosis [Source:HGNC Symbol-3BAcc:HGNC:592]
NR_015451	XIAP	X-linked inhibitor of apoptosis [Source:HGNC Symbol-3BAcc:HGNC:592]
NONHSAT089168	XPNPEP3	X-prolyl aminopeptidase 3-2C mitochondrial [Source:HGNC Symbol-3BAcc:HGNC:28052]
NR_015451	XPNPEP3	X-prolyl aminopeptidase 3-2C mitochondrial [Source:HGNC Symbol-3BAcc:HGNC:28052]
NONHSAT089168	ZBP1	Z-DNA binding protein 1 [Source:HGNC Symbol-3BAcc:HGNC:16176]
NONHSAT089168	ZBTB8A	zinc finger and BTB domain containing 8A [Source:HGNC Symbol-3BAcc:HGNC:24172]
NONHSAT089168	ZDHHC3	zinc finger DHHC-type containing 3 [Source:HGNC Symbol-3BAcc:HGNC:18470]
NR_015451	ZDHHC3	zinc finger DHHC-type containing 3 [Source:HGNC Symbol-3BAcc:HGNC:18470]
lnc-MUC20-9:1	ZFP82	ZFP82 zinc finger protein [Source:HGNC Symbol-3BAcc:HGNC:28682]
NONHSAT089168	ZFP82	ZFP82 zinc finger protein [Source:HGNC Symbol-3BAcc:HGNC:28682]
NR_015451	ZFP82	ZFP82 zinc finger protein [Source:HGNC Symbol-3BAcc:HGNC:28682]
lnc-MUC20-9:1	ZHX3	zinc fingers and homeoboxes 3 [Source:HGNC Symbol-3BAcc:HGNC:15935]
lnc-MUC20-9:1	ZKSCAN1	zinc finger with KRAB and SCAN domains 1 [Source:HGNC Symbol-3BAcc:HGNC:13101]
lnc-MUC20-9:1	ZMAT3	zinc finger matrin-type 3 [Source:HGNC Symbol-3BAcc:HGNC:29983]
NONHSAT089168	ZMAT3	zinc finger matrin-type 3 [Source:HGNC Symbol-3BAcc:HGNC:29983]
NR_015451	ZMAT3	zinc finger matrin-type 3 [Source:HGNC Symbol-3BAcc:HGNC:29983]
lnc-MUC20-9:1	ZNF106	zinc finger protein 106 [Source:HGNC Symbol-3BAcc:HGNC:12886]
NONHSAT089168	ZNF114	zinc finger protein 114 [Source:HGNC Symbol-3BAcc:HGNC:12894]
NR_015451	ZNF114	zinc finger protein 114 [Source:HGNC Symbol-3BAcc:HGNC:12894]
NONHSAT089168	ZNF124	zinc finger protein 124 [Source:HGNC Symbol-3BAcc:HGNC:12907]
NR_015451	ZNF124	zinc finger protein 124 [Source:HGNC Symbol-3BAcc:HGNC:12907]
NR_015451	ZNF426	zinc finger protein 426 [Source:HGNC Symbol-3BAcc:HGNC:20725]
lnc-HSP90B1-3:1	ZNF451	zinc finger protein 451 [Source:HGNC Symbol-3BAcc:HGNC:21091]
NR_015451	ZNF454	zinc finger protein 454 [Source:HGNC Symbol-3BAcc:HGNC:21200]
lnc-HSP90B1-3:1	ZNF490	zinc finger protein 490 [Source:HGNC Symbol-3BAcc:HGNC:23705]
NR_015451	ZNF514	zinc finger protein 514 [Source:HGNC Symbol-3BAcc:HGNC:25894]
lnc-HSP90B1-3:1	ZNF529	zinc finger protein 529 [Source:HGNC Symbol-3BAcc:HGNC:29328]
lnc-HSP90B1-3:1	ZNF530	zinc finger protein 530 [Source:HGNC Symbol-3BAcc:HGNC:29297]
lnc-HSP90B1-3:1	ZNF543	zinc finger protein 543 [Source:HGNC Symbol-3BAcc:HGNC:25281]
NR_015451	ZNF543	zinc finger protein 543 [Source:HGNC Symbol-3BAcc:HGNC:25281]
NONHSAT089168	ZNF554	zinc finger protein 554 [Source:HGNC Symbol-3BAcc:HGNC:26629]
NR_015451	ZNF554	zinc finger protein 554 [Source:HGNC Symbol-3BAcc:HGNC:26629]
NONHSAT089168	ZNF652	zinc finger protein 652 [Source:HGNC Symbol-3BAcc:HGNC:29147]
lnc-MUC20-9:1	ZNF655	zinc finger protein 655 [Source:HGNC Symbol-3BAcc:HGNC:30899]
lnc-MUC20-9:1	ZNF665	zinc finger protein 665 [Source:HGNC Symbol-3BAcc:HGNC:25885]
NR_015451	ZNF793	zinc finger protein 793 [Source:HGNC Symbol-3BAcc:HGNC:33115]
NR_015451	ZNF805	zinc finger protein 805 [Source:HGNC Symbol-3BAcc:HGNC:23272]
NONHSAT089168	ZNF91	zinc finger protein 91 [Source:HGNC Symbol-3BAcc:HGNC:13166]
lnc-MUC20-9:1	ZRANB3	zinc finger RANBP2-type containing 3 [Source:HGNC Symbol-3BAcc:HGNC:25249]
lncRNA, long non-coding RNA.
